# Supplementary material
Source: MDPI journal article supplement (https://www.mdpi.com/2674-0494/1/2/14)
Supplement: s1 [file s1]

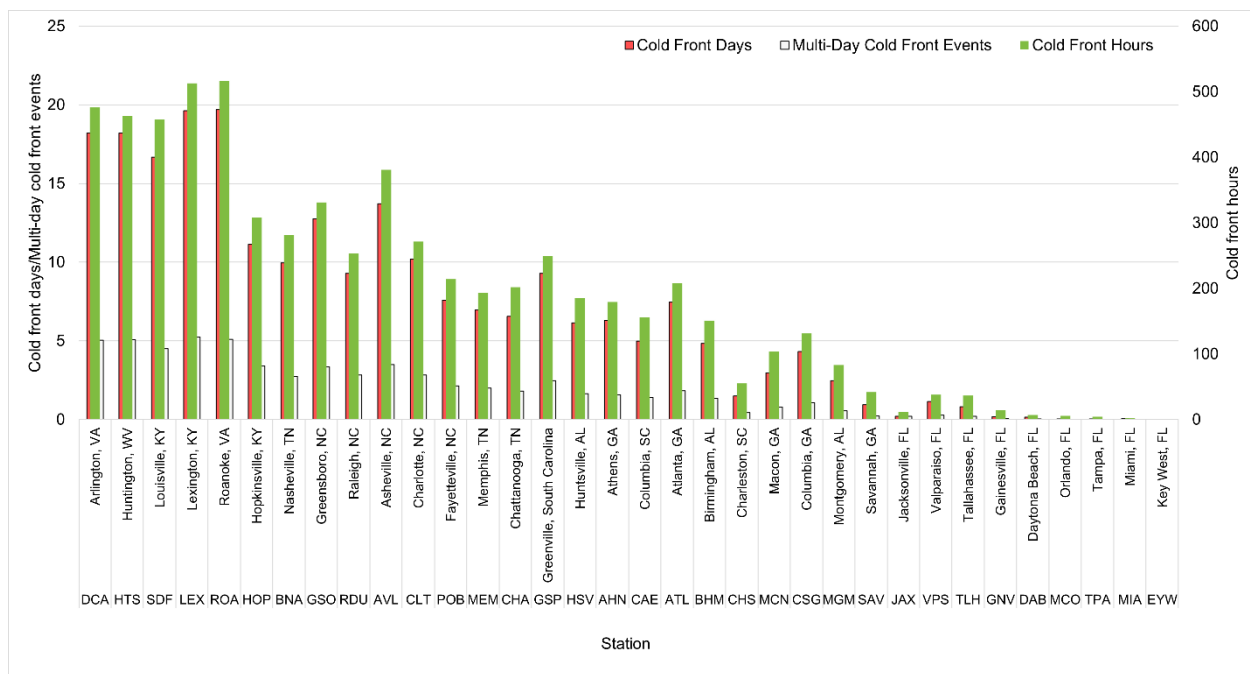

**Figure S1.** Data for cold front hours, cold front days, and multi-day cold front events for the 34 stations evaluated based on data from 1973–2020.
